# Supplementary material for: 2.5 V compact supercapacitors based on ultrathin carbon nanotube films for AC line filtering
Source: Royal Society of Chemistry journal article supplement (doi:10.1039/c5ta02073e), 2015-01-01
Supplement: c5ta02073e1.pdf [file c5ta02073e1.pdf]

## Supporting Information

### 2.5 V Compact Supercapacitors Based on Ultrathin Carbon Nanotube Films for AC Line Filtering

Yongju Yoo,<sup>a</sup> Seungwook Kim,<sup>b</sup> Byungwoo Kim,<sup>a</sup> and Woong Kim<sup>\*a</sup>

<sup>a</sup>Department of Materials Science and Engineering, Korea University, Seoul 136-713, Republic of Korea

<sup>b</sup>Department of Nano-Semiconductor Engineering, Korea University, Seoul 136-713, Republic of Korea

E-mail: woongkim@korea.ac.kr

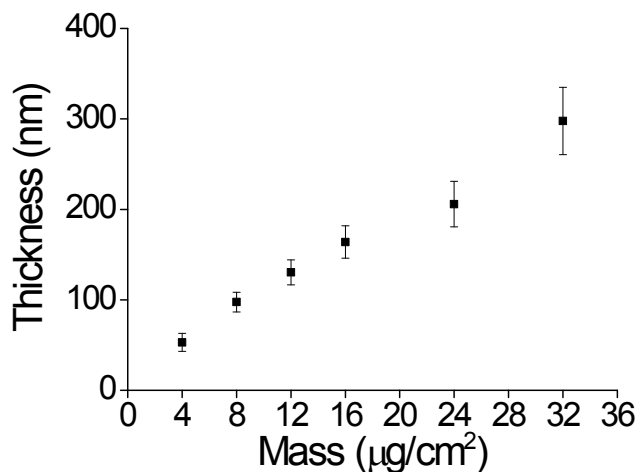

**Fig. S1.** The relationship between the thickness and mass of CNT films.

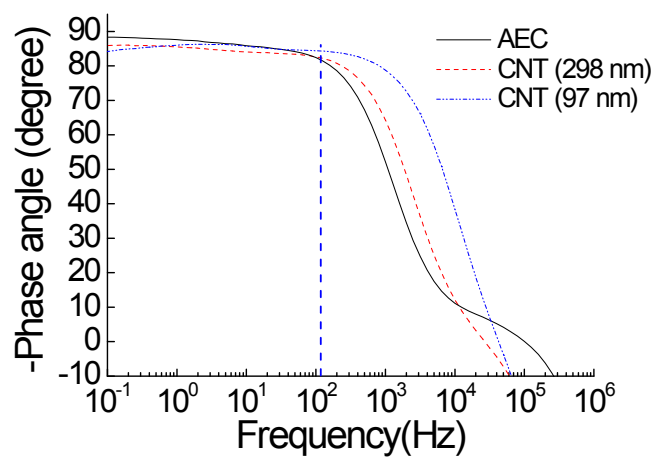

**Fig. S2.** Bode phase plots of CNT supercapacitors and an AEC. The numbers in parentheses are the thickness of the CNT films.

## Equations

$$C_{vol} = \frac{I}{\frac{dv}{dt} \times 2 \times \text{volume of single electrode material}}$$

$$E_{vol} = \frac{1}{2 \times 3.6} C_{vol} V^2$$

$$P_{vol} = \frac{E_{vol} \times 3.6}{\Delta t}$$

$$\tau_{RC} = R_{120 \text{ Hz}} \times C_{120 \text{ Hz}}$$

$$R_{120 \text{ Hz}} = Z'_{120 \text{ Hz}}$$

$$C_{vol, 120 \text{ Hz}} = \frac{C_A}{2 \times \text{thickness of single electrode material}}$$

$$C'' = \frac{Z'}{2\pi f \cdot |Z|^2}$$

$$C_{areal} = \frac{-1}{2\pi f S Z''}$$

$$S = \text{area of an electrode}$$
